# Supplementary material
Source: ML conference proceedings conference paper supplement (https://openaccess.thecvf.com/content/ACCV2022/html/Huang_A_Joint_Framework_ACCV_2022_paper.html)
Supplement: Supplementary file 1 [file Huang_A_Joint_Framework_ACCV_2022_supplemental.pdf]

# A Joint Framework Towards Class-aware and Class-agnostic Alignment for Few-shot Segmentation

Kai Huang<sup>1\*</sup>[0000-0003-3700-9052], Mingfei Cheng<sup>2\*</sup>[0000-0002-8982-1483], and Yang Wang<sup>1</sup> and Bochen Wang<sup>1</sup> and Ye Xi<sup>1</sup> and feigege wang<sup>1</sup> and Peng Chen<sup>1</sup>

<sup>1</sup> Alibaba Group, China

{zhouwan.hk, wanyuan.wy, bochen.wbc, yx150449, feigege.wfgg, yuanshang.cp}@alibaba-inc.com

<sup>2</sup> Singapore Management University, Singapore  
snowbirds.mf@gmail.com

In this material, we firstly report the further ablation study on Hybrid Prototype Alignment Module (HPAM) to explore the application of multi-scale, and then further show the effect of block sizes ( $m$ ) and top $k$  ratio ( $k$ ) in the P2P module.

## 1 More Study on HPAM with Multi-Scale Scheme

Table 1 reports the ablation studies of multi-scale scheme. “BL” means the baseline of this ablation study which removes the multi-scale scheme as well as the Hybrid Prototype Alignment Module, “BL\*” indicates the baseline with multi-scale scheme. We also conduct the single HPAM with only choosing the middle layer features, which are represented as “BL  $w$ / single HPAM” and “BL\*  $w$ / single HPAM” respectively. And “BL\*  $w$ / HPAM” is the complete framework of our JC<sup>2</sup>A, in which the HPAM acts in each scale feature maps. From Table 1, we can draw the following conclusion as: 1) It is clear that multi-scale scheme can greatly improve the segmentation performance which has been verified in many FSS methods. 2) Not only for normal baseline but also the baseline with multi-scale scheme, our single HPAM can still make positive effect. 3) the model with multi-scale HPAM achieves highest accuracy in all folds, proving the superiority of our HPAM with multi-scale scheme.

## 2 Block size and top $k$ settings

We further analyzed the effect of different block sizes ( $m$ ) and the choice of top $k$  ratio ( $k$ ) in the P2B. As shown in Table 2, we find that the performance drops with the expansion of block size. These result with different  $m$  settings indicate that the large block is able to introduce more irrelevant semantic noises which weaken the representation of target parts within specific regions. Besides, setting  $k$  to 20% achieves the best performance while using all blocked features brings

---

\* Equal contribution.

**Table 1.** The performance comparison of 1-shot and 5-shot segmentation on PASCAL-5<sup>t</sup>. Best-performing results are highlighted in bold.

| Method                    | 1-shot      |             |             |             |             |             | 5-shot      |             |             |             |             |             |
|---------------------------|-------------|-------------|-------------|-------------|-------------|-------------|-------------|-------------|-------------|-------------|-------------|-------------|
|                           | fold-0      | fold-1      | fold-2      | fold-3      | <i>mIoU</i> | FB-IoU      | fold-0      | fold-1      | fold-2      | fold-3      | <i>mIoU</i> | FB-IoU      |
| BL                        | 59.3        | 67.0        | 52.9        | 53.5        | 58.2        | 69.5        | 62.8        | 67.3        | 51.6        | 55.7        | 59.4        | 70.2        |
| BL*                       | 62.8        | 69.6        | 54.8        | 56.5        | 60.9        | 72.2        | 65.8        | 68.7        | 54.9        | 58.9        | 62.1        | 72.9        |
| BL <i>w/</i> single HPAM  | 63.7        | 69.5        | 54.0        | 57.9        | 61.3        | 72.7        | 65.1        | 69.9        | 55.4        | 59.0        | 62.4        | 73.0        |
| BL* <i>w/</i> single HPAM | 65.4        | 71.2        | 56.5        | 59.0        | 63.0        | 75.2        | 67.7        | 71.8        | 57.3        | 61.4        | 64.6        | 74.8        |
| BL* <i>w/</i> HPAM (our)  | <b>67.3</b> | <b>72.4</b> | <b>57.7</b> | <b>60.7</b> | <b>64.5</b> | <b>76.5</b> | <b>68.6</b> | <b>72.9</b> | <b>58.7</b> | <b>62.0</b> | <b>65.4</b> | <b>76.8</b> |

negative effects. We can infer that our block selection of P2B can keep most relevant class-aware information without reducing computational efficiency.

**Table 2.** Ablation study on different block sizes ( $m$ ) and top $k$  ratio ( $k$ ) settings in P2B. “./.” represents the results of “1-shot/5-shot”.

| $k$   | 10%       | 20%              | 30%       | 40%       | 50%       | 60%       | 70%       | 80%       |
|-------|-----------|------------------|-----------|-----------|-----------|-----------|-----------|-----------|
| $m=3$ | 62.1/63.7 | <b>64.5/65.4</b> | 64.3/65.0 | 64.2/65.1 | 64.4/65.3 | 64.5/65.2 | 64.1/64.9 | 63.0/64.3 |
| $m=5$ | 61.4/62.8 | 63.2/64.1        | 63.0/64.0 | 63.5/64.7 | 62.9/63.4 | 63.3/63.8 | 62.2/63.2 | 62.0/63.7 |
| $m=7$ | 60.7/61.9 | 63.0/64.4        | 62.9/63.7 | 62.5/63.7 | 63.1/64.2 | 62.7/64.4 | 62.0/63.6 | 61.6/62.9 |
